# Supplementary material
Source: PubMed Central journal article supplement (PMC1693722)

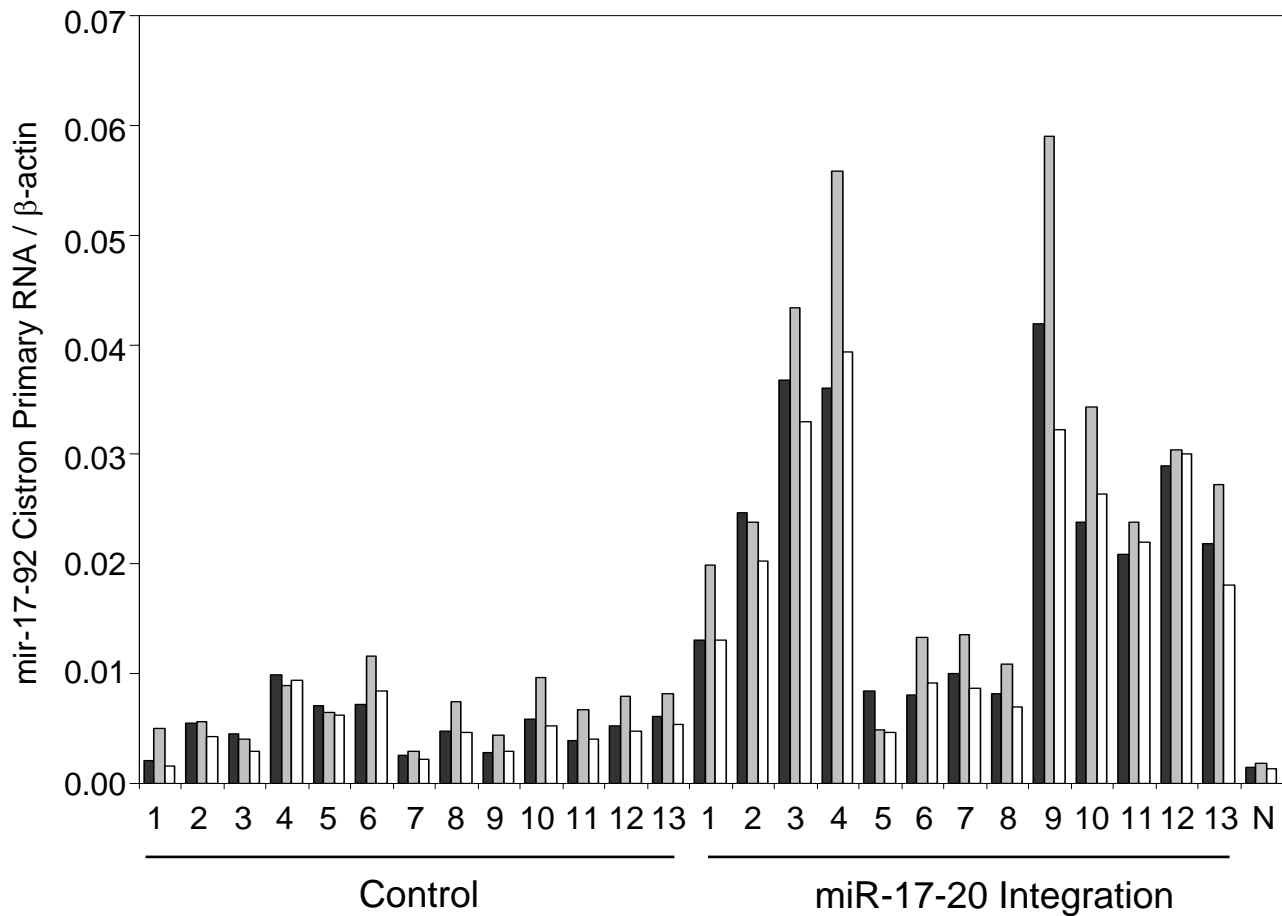

Supplement: pnas_0609030103_1.pdf [file pnas_0609030103_1.pdf]

PCR Cycle Threshold

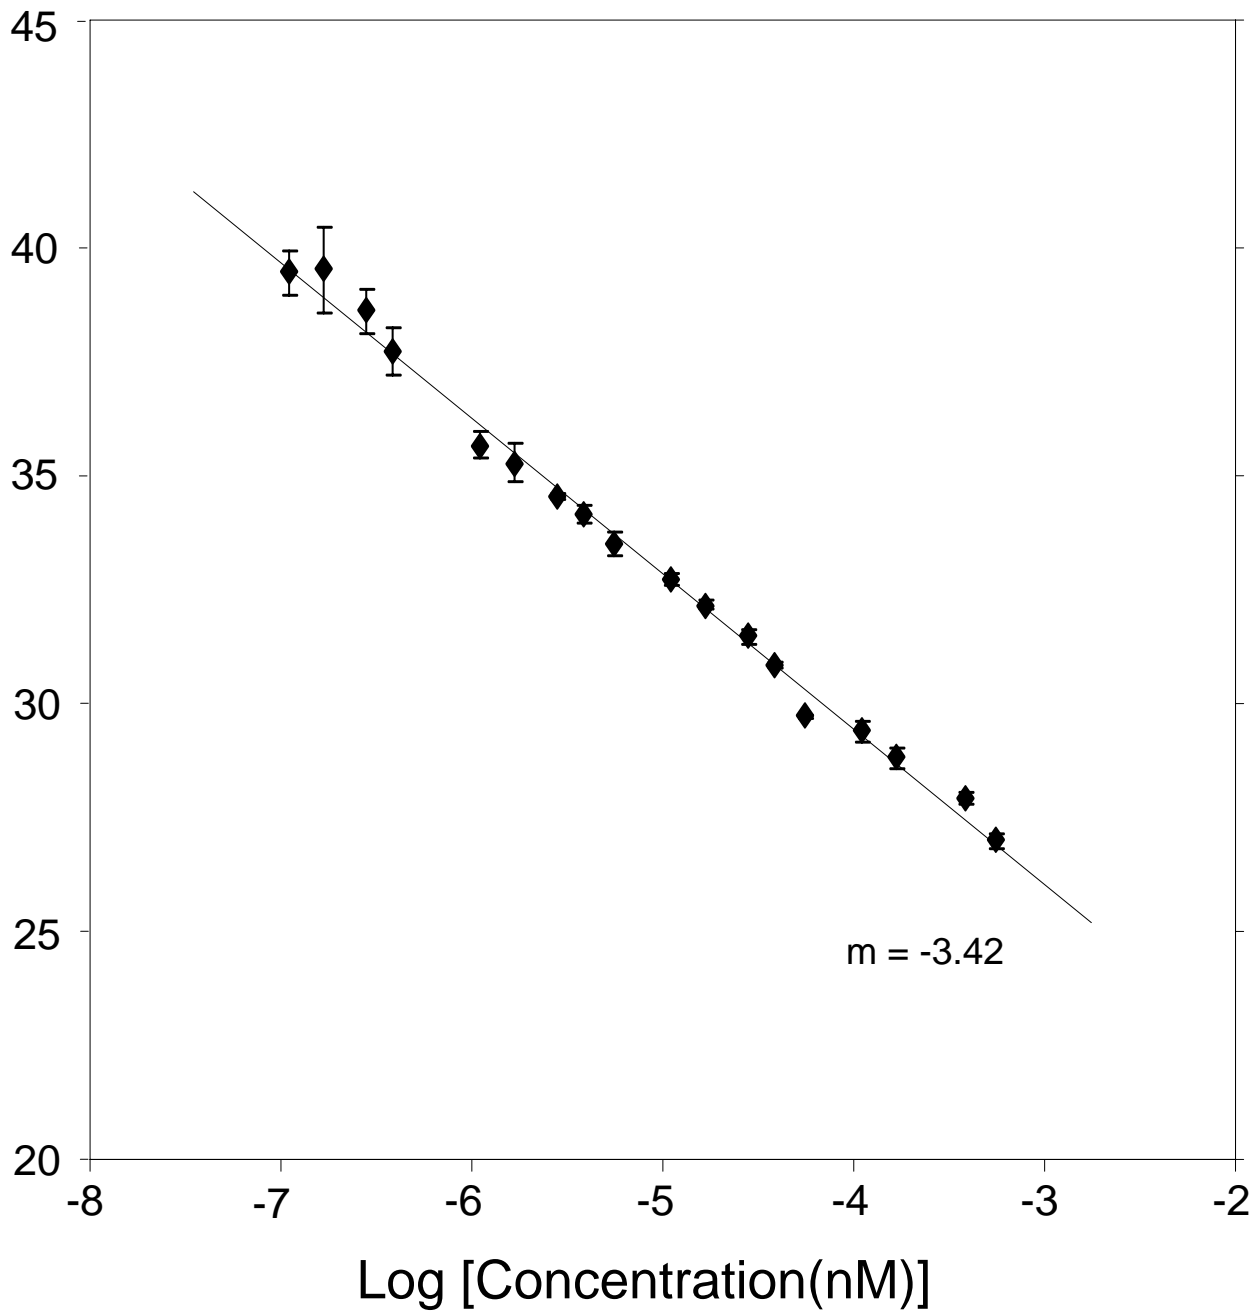

Supplement: pnas_0609030103_2.pdf [file pnas_0609030103_2.pdf]

# Cycle Threshold

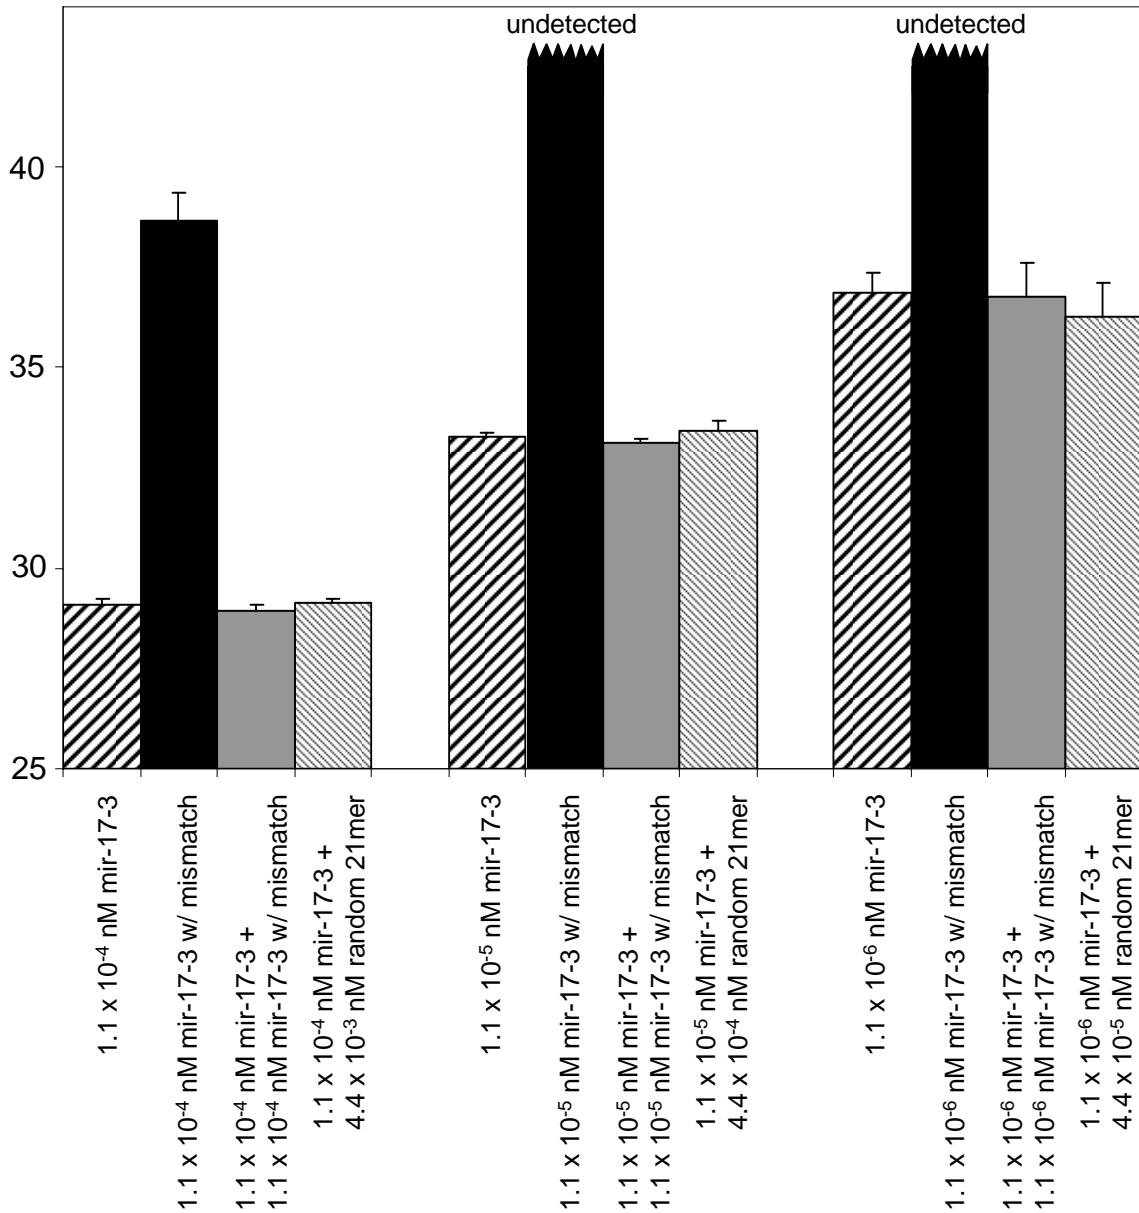

Supplement: pnas_0609030103_3.pdf [file pnas_0609030103_3.pdf]

gpc5 Relative Expression

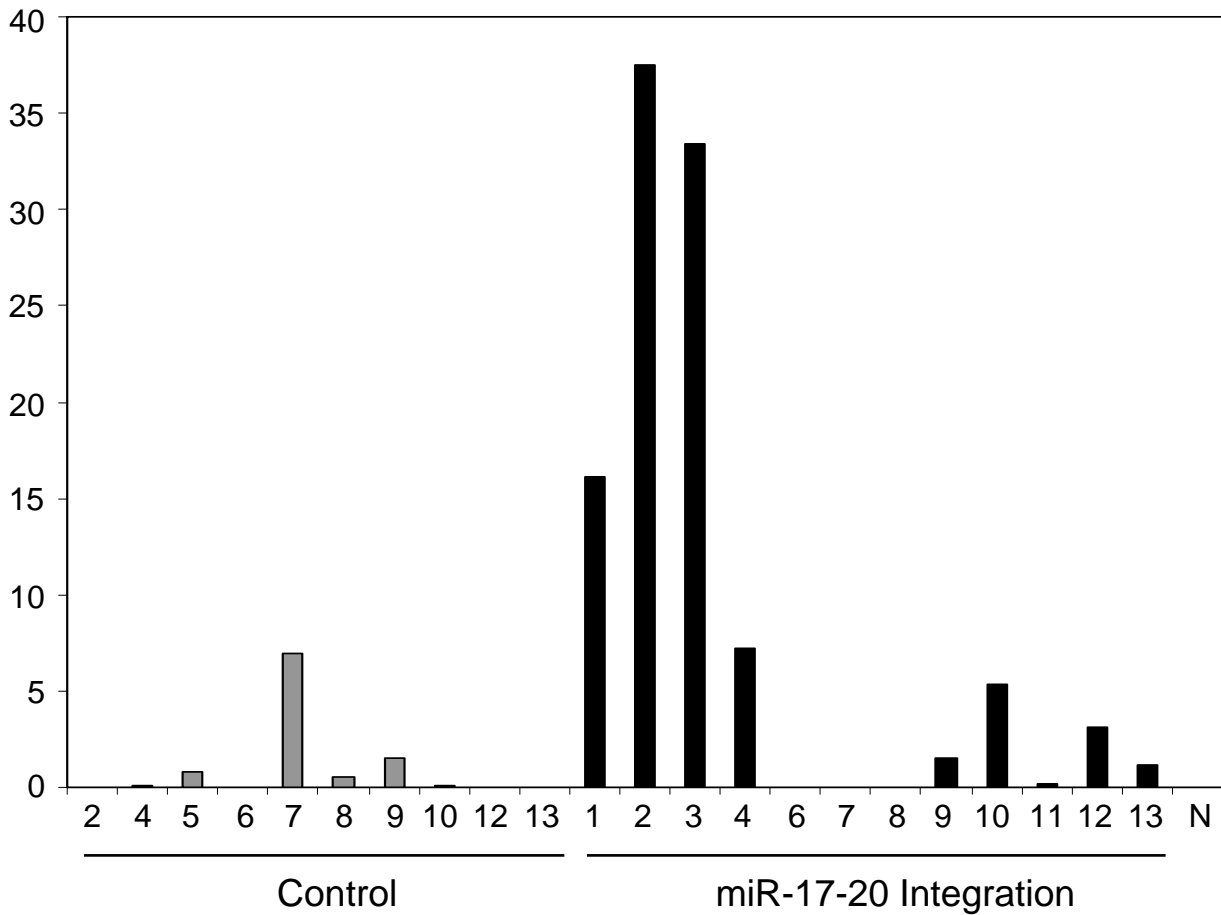

Supplement: pnas_0609030103_4.pdf [file pnas_0609030103_4.pdf]

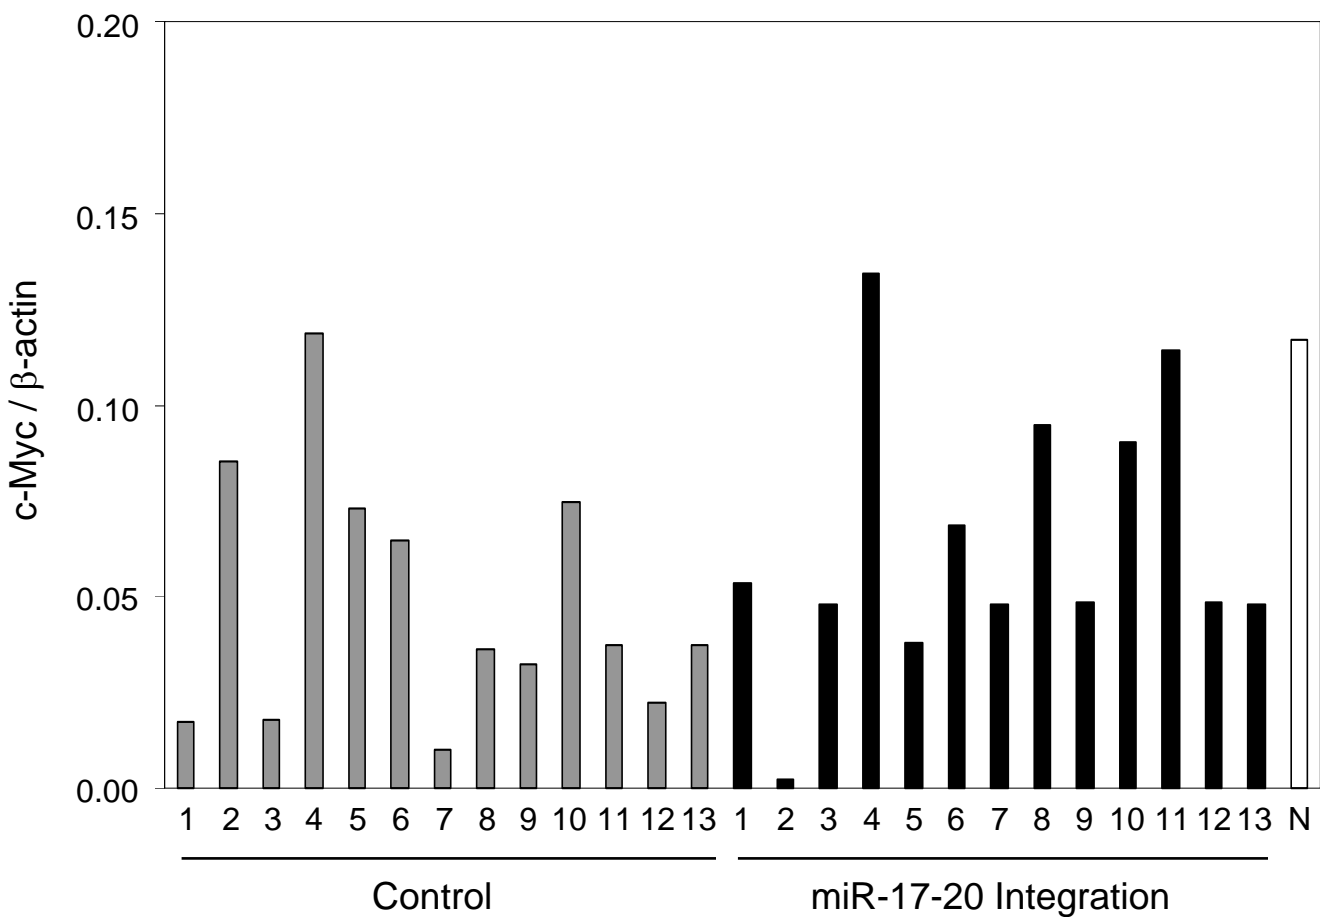

Supplement: pnas_0609030103_5.pdf [file pnas_0609030103_5.pdf]
